# Supplementary material for: Characterization and Genome Study of Novel Lytic Bacteriophages against Prevailing Saprophytic Bacterial Microflora of Minimally Processed Plant-Based Food Products
Source: MDPI journal article supplement (doi:10.3390/ijms222212460), 2021-11-18
Supplement: s1 [file s1]

**Table S2.** BLASTn alignment of homologs phages sequences (at the GenBank database) with isolated phages

| Phage (complete genome)            | Phage Family             | Genome     | Isolated Country | Isolation Source                            | Lab Host                                  | Accession No. | Lenght (bp) | E value | Query coverage | Percent identity |
|------------------------------------|--------------------------|------------|------------------|---------------------------------------------|-------------------------------------------|---------------|-------------|---------|----------------|------------------|
| <i>Enterobacter</i> phage KKP 3263 |                          |            |                  |                                             |                                           |               |             |         |                |                  |
| Escherichia phage vB_EcoP_SP7      | <i>Autographiviridae</i> | Linear DNA | Portugal         | Waste water from pig farming                | No data                                   | MT682707.1    | 39305       | 0.0     | 87%            | 92.52%           |
| Escherichia phage Peacock          | <i>Autographiviridae</i> | Linear DNA | USA              | Waste water treatment plant influent sample | <i>Escherichia coli</i>                   | MK903279.1    | 39233       | 0.0     | 85%            | 93.76%           |
| Salmonella phage vB_Sej3-1         | <i>Autographiviridae</i> | Linear DNA | China            | No data                                     | <i>Salmonella</i> Typhi CMCC50071         | MW416012.1    | 39619       | 0.0     | 85%            | 91.58%           |
| Hafnia phage vB_HpaA_yong1         | <i>Autographiviridae</i> | Linear DNA | China            | River water                                 | <i>Hafnia paralvei</i> strain LY-23       | MK610268.1    | 40286       | 0.0     | 85%            | 92.16%           |
| Escherichia phage vB_EcoP_GA2A     | <i>Autographiviridae</i> | Linear DNA | Canada           | Speed River                                 | <i>Escherichia coli</i> O:45 strain C1328 | KT990215.1    | 40470       | 0.0     | 85%            | 92.43%           |
| Escherichia phage CLB_P1           | <i>Autographiviridae</i> | Linear DNA | France           | No data                                     | No data                                   | KC109329.1    | 40218       | 0.0     | 84%            | 93.81%           |
| Escherichia phage PE3-1            | <i>Autographiviridae</i> | Linear DNA | China            | No data                                     | <i>Escherichia coli</i> O153              | KJ748011.1    | 39093       | 0.0     | 84%            | 92.70%           |
| Escherichia phage JSS1             | <i>Autographiviridae</i> | Linear DNA | China            | No data                                     | <i>Escherichia coli</i> O153              | KX689784.2    | 39024       | 0.0     | 84%            | 92.66%           |

c.d. **Table S2.** BLASTn alignment of homologs phages sequences (at the GenBank database) with isolated phages

| Phage (complete genome)               | Phage Family             | Genome       | Isolated Country   | Isolation Source | Lab Host                                  | Accession No. | Lenght (bp) | E value | Query coverage | Percent identity |
|---------------------------------------|--------------------------|--------------|--------------------|------------------|-------------------------------------------|---------------|-------------|---------|----------------|------------------|
| Escherichia phage LM33_P1             | <i>Autographiviridae</i> | Linear DNA   | France             | No data          | <i>Escherichia coli</i> LM33              | LT594300.1    | 38979       | 0.0     | 84%            | 93.36%           |
| Escherichia phage Mt1B1_P3            | <i>Autographiviridae</i> | Linear DNA   | France             | Sewage water     | <i>Escherichia coli</i> Mt1B1             | MT496969.1    | 40313       | 0.0     | 84%            | 93.05%           |
| Escherichia virus Vec13               | <i>Autographiviridae</i> | Linear DNA   | Russian Federation | Farm sewage      | <i>Escherichia coli</i>                   | NC_048023.1   | 39747       | 0.0     | 84%            | 93.13%           |
| Escherichia phage DY1                 | <i>Autographiviridae</i> | Linear DNA   | China              | Pearl River      | <i>Escherichia coli</i>                   | MT808983.1    | 39817       | 0.0     | 84%            | 92.85%           |
| Escherichia phage vB_EcoP_F           | <i>Autographiviridae</i> | Linear DNA   | United Kingdom     | No data          | <i>Escherichia coli</i> O18ac:K1:H7 ColV+ | NC_047808.1   | 39300       | 0.0     | 84%            | 94.05%           |
| Escherichia phage ST31                | <i>Autographiviridae</i> | Circular DNA | USA                | No data          | <i>Escherichia coli</i> ST130             | NC_047829.1   | 39693       | 0.0     | 84%            | 93.52%           |
| Citrobacter phage SH3                 | <i>Autographiviridae</i> | Linear DNA   | Canada             | No data          | <i>Citrobacter freundii</i> CF3           | KU687349.1    | 39444       | 0.0     | 84%            | 94.29%           |
| Enterobacteria phage EcoDS1           | <i>Autographiviridae</i> | Linear DNA   | USA                | No data          | <i>Escherichia coli</i>                   | EU734172.1    | 39252       | 0.0     | 84%            | 93.79%           |
| <b><i>Serratia</i> phage KKP 3264</b> |                          |              |                    |                  |                                           |               |             |         |                |                  |
| Escherichia phage arall               | <i>Myoviridae</i>        | Linear DNA   | Denmark            | Waste water      | <i>Escherichia coli</i> K-12 MG1655       | MN850584.1    | 145715      | 0.0     | 95%            | 98.02%           |
| Escherichia phage vB_vPM_PD06         | <i>Myoviridae</i>        | Circular DNA | USA                | No data          | <i>Escherichia coli</i>                   | NC_052653.1   | 149506      | 0.0     | 95%            | 98.75%           |
| Escherichia phage alia                | <i>Myoviridae</i>        | Linear DNA   | Denmark            | Waste water      | <i>Escherichia coli</i> K-12 MG1655       | NC_052655.1   | 147009      | 0.0     | 95%            | 98.03%           |

c.d. **Table S2.** BLASTn alignment of homologs phages sequences (at the GenBank database) with isolated phages

| Phage (complete genome)                   | Phage Family      | Genome       | Isolated Country | Isolation Source | Lab Host                                         | Accession No. | Lenght (bp) | E value | Query coverage | Percent identity |
|-------------------------------------------|-------------------|--------------|------------------|------------------|--------------------------------------------------|---------------|-------------|---------|----------------|------------------|
| Escherichia phage vB_vPM_PD114            | <i>Myoviridae</i> | Circular DNA | China            | No data          | <i>Escherichia coli</i>                          | MH675927.1    | 150354      | 0.0     | 95%            | 98.50%           |
| Enterobacteria phage ECGD1                | <i>Myoviridae</i> | Linear DNA   | China            | No data          | No data                                          | KU522583.1    | 146647      | 0.0     | 94%            | 98.73%           |
| Escherichia phage vB_EcoM_PHB05           | <i>Myoviridae</i> | Linear DNA   | China            | Waste water      | Shiga toxin-producing<br><i>Escherichia coli</i> | NC_052652.1   | 147659      | 0.0     | 94%            | 99.03%           |
| Escherichia phage inny                    | <i>Myoviridae</i> | Linear DNA   | Denmark          | Waste water      | <i>Escherichia coli</i> K-12 MG1655              | MN850601.1    | 147483      | 0.0     | 94%            | 97.59%           |
| Enterobacteria phage phi92                | <i>Myoviridae</i> | Linear DNA   | Germany          | No data          | <i>Escherichia coli</i> K92                      | FR775895.2    | 148612      | 0.0     | 94%            | 97.96%           |
| Escherichia phage outra                   | <i>Myoviridae</i> | Linear DNA   | Denmark          | Waste water      | <i>Escherichia coli</i> K-12 MG1655              | MN850645.1    | 145482      | 0.0     | 94%            | 98.54%           |
| Escherichia phage muut                    | <i>Myoviridae</i> | Linear DNA   | Denmark          | Waste water      | <i>Escherichia coli</i> K-12 MG1655              | NC_052657.1   | 146307      | 0.0     | 94%            | 98.41%           |
| <b><i>Enterobacter</i> phage KKP 3262</b> |                   |              |                  |                  |                                                  |               |             |         |                |                  |
| Klebsiella phage vB_KaeM_KaAlpha          | <i>Myoviridae</i> | Linear DNA   | USA              | Raw sewage       | <i>Klebsiella aerogenes</i>                      | MN013084.1    | 172334      | 0.0     | 96%            | 96.83%           |
| Enterobacter phage PG7                    | <i>Myoviridae</i> | Linear DNA   | China            | Fishpond water   | <i>Enterobacter cloacae</i> clinial isolate EC7  | KJ101592.1    | 173276      | 0.0     | 95%            | 95.32%           |

c.d. **Table S2.** BLASTn alignment of homologs phages sequences (at the GenBank database) with isolated phages

| Phage (complete genome)                                    | Phage Family      | Genome     | Isolated Country | Isolation Source                  | Lab Host                                            | Accession No. | Lenght (bp) | E value | Query coverage | Percent identity |
|------------------------------------------------------------|-------------------|------------|------------------|-----------------------------------|-----------------------------------------------------|---------------|-------------|---------|----------------|------------------|
| Cronobacter phage Pet-CM3-4                                | <i>Myoviridae</i> | Linear DNA | Slovakia         | Waste water                       | <i>Cronobacter malonaticus</i><br>LMG 23826         | NC_055726.1   | 171975      | 0.0     | 94%            | 98.29%           |
| <b><i>Citrobacter</i> phage KKP 3664</b>                   |                   |            |                  |                                   |                                                     |               |             |         |                |                  |
| Citrobacter phage vB_CfrM_CfP1                             | <i>Myoviridae</i> | Linear DNA | Portugal         | Waste water<br>plant raw effluent | No data                                             | KX245890.1    | 180219      | 0.0     | 96%            | 90.00%           |
| Citrobacter phage Miller                                   | <i>Myoviridae</i> | Linear DNA | USA              | No data                           | No data                                             | KM236237.1    | 178171      | 0.0     | 96%            | 94.83%           |
| Buttiauxella phage vB_ButM_GuL6                            | <i>Myoviridae</i> | Linear DNA | Lithuania        | No data                           | <i>Buttiauxella</i> sp.<br>environmental isolate G6 | MT334653.1    | 178039      | 0.0     | 96%            | 90.98%           |
| Citrobacter phage vB_Cfr_Xman                              | <i>Myoviridae</i> | Linear DNA | USA              | No data                           | <i>Citrobacter</i> sp.                              | MW021749.1    | 178331      | 0.0     | 95%            | 90.05%           |
| Enterobacteria phage RB43,<br>isolate RB43-GVA             | <i>Myoviridae</i> | Linear DNA | France           | No data                           | No data                                             | HE858210.2    | 179836      | 0.0     | 95%            | 94.70%           |
| Enterobacteria phage RB43,<br>isolate RB43-GVA orf057::gfp | <i>Myoviridae</i> | Linear DNA | France           | No data                           | No data                                             | HE981739.1    | 179839      | 0.0     | 95%            | 94.70%           |
| Enterobacteria phage RB43                                  | <i>Myoviridae</i> | Linear DNA | USA              | No data                           | No data                                             | AY967407.1    | 180500      | 0.0     | 95%            | 94.69%           |
| Escherichia phage Lw1                                      | <i>Myoviridae</i> | Linear DNA | Ukraine          | No data                           | <i>Escherichia coli</i><br>BL21 (DE3)               | KC801932.2    | 176227      | 0.0     | 94%            | 90.91%           |
| Citrobacter phage IME-CF2                                  | <i>Myoviridae</i> | Linear DNA | China            | Hospital<br>sewage                | <i>Citrobacter freundii</i>                         | KR869820.1    | 177688      | 0.0     | 94%            | 91.83%           |
| Escherichia phage RB16                                     | <i>Myoviridae</i> | Linear DNA | USA              | No data                           | <i>Escherichia coli</i>                             | HM134276.1    | 176788      | 0.0     | 94%            | 95.05%           |
